# Supplementary material for: Assessing the extent and timing of chemosensory impairments during COVID-19 pandemic
Source: PubMed Central journal article supplement (PMC8410776; doi:10.1038/s41598-021-96987-0), 2021-09-01
Supplement: 41598_2021_96987_MOESM1_ESM.pdf [file 41598_2021_96987_MOESM1_ESM.pdf]

## Supplementary material

### Assessing the extent and timing of chemosensory impairments during COVID-19 pandemic

Cinzia Cecchetto<sup>1</sup>, Antonella Di Pizio<sup>2</sup>, Federica Genovese<sup>3</sup>, Orietta Calcinoni<sup>4</sup>, Alberto Macchi<sup>5</sup>, Andreas Dunkel<sup>2</sup>, Kathrin Ohla<sup>6</sup>, Sara Spinelli<sup>7</sup>, Michael C. Farruggia<sup>8</sup>, Paule V. Joseph<sup>9,10,11</sup>, Anna Menini<sup>12</sup>, Elena Cantone<sup>13</sup>, Caterina Dinnella<sup>7</sup>, Maria Paola Cecchini<sup>14</sup>, Anna D'Errico<sup>15</sup>, Carla Mucignat-Caretta<sup>16</sup>, Valentina Parma<sup>3,17</sup>, Michele Dibattista<sup>18</sup>

<sup>1</sup>Department of General Psychology, University of Padova, Italy; <sup>2</sup>Leibniz-Institute for Food Systems Biology at the Technical University of Munich, Germany; <sup>3</sup>Department of Physiology, Monell Chemical Senses Center, USA; <sup>4</sup>Private practice VMPCT, Milan, Italy; <sup>5</sup>ENT department, Italian Academy Of Rhinology - ASST sette laghi Varese; <sup>6</sup> Helmut-Schmidt-University/University of the Federal Armed Forces Hamburg, Experimental Psychology Unit, Hamburg, Germany; <sup>7</sup>Department of Agriculture, Food, Environment and Forestry (DAGRI), University of Florence, Italy;

<sup>8</sup>Interdepartmental Neuroscience Program, Yale University, USA; <sup>9</sup>National Institutes of Nursing Research, <sup>10</sup>National Institute of Alcohol Abuse and Alcoholism, <sup>11</sup>National Institutes of Health, <sup>12</sup>Neurobiology Section, SISSA, International School for Advanced Studies, Italy; <sup>13</sup>Department of Neuroscience, ENT section, Federico II University of Naples, Italy; <sup>14</sup>Department of Neurosciences, Biomedicine and Movement Sciences, Anatomy and Histology Section, University of Verona, Italy; <sup>15</sup>Department of Neurobiology, Goethe Universität Frankfurt, Germany; <sup>16</sup>Department of Molecular Medicine, University of Padova, Italy; <sup>17</sup>Department of Psychology, Temple University, USA;

<sup>18</sup>Department of Basic Medical Sciences, University of Bari A. Moro

#### Corresponding Author:

Michele Dibattista, PhD  
Department of Basic Medical Sciences,  
Neuroscience and Sense Organs,  
University of Bari A. Moro,  
Piazza Giulio Cesare n.11, 70125 Bari, Italy.  
e-mail: [michele.dibattista@uniba.it](mailto:michele.dibattista@uniba.it)

**Table 1s.** Frequency table of the pattern of chemosensory loss and recovery clusters in relation to days between the date of onset and completion of the questionnaire. Chemosensory loss clusters: 1 = moderate smell/taste loss and preserved chemesthesis; 2 = substantial smell, taste, and chemesthesis loss; 3 = substantial smell and taste loss, but preserved chemesthesis.

| <b>Chemosensory loss</b> | <b>Time intervals</b> | <b>Chemosensory recovery</b> | <b>Frequency</b> |
|--------------------------|-----------------------|------------------------------|------------------|
| 1                        | <30 days              | Partial                      | 30               |
| 1                        | <30 days              | Substantial                  | 5                |
| 1                        | >90 days              | Partial                      | 5                |
| 1                        | 31 - 60 days          | Partial                      | 73               |
| 1                        | 31 - 60 days          | Substantial                  | 10               |
| 1                        | 61 - 90 days          | Partial                      | 9                |
| 2                        | <30 days              | Partial                      | 45               |
| 2                        | <30 days              | Substantial                  | 67               |
| 2                        | >90 days              | Partial                      | 6                |
| 2                        | >90 days              | Substantial                  | 5                |
| 2                        | 31 - 60 days          | Partial                      | 117              |
| 2                        | 31 - 60 days          | Substantial                  | 256              |
| 2                        | 61 - 90 days          | Partial                      | 8                |
| 2                        | 61 - 90 days          | Substantial                  | 12               |
| 3                        | <30 days              | Partial                      | 26               |
| 3                        | <30 days              | Substantial                  | 27               |
| 3                        | >90 days              | Partial                      | 11               |
| 3                        | >90 days              | Substantial                  | 1                |
| 3                        | 31 - 60 days          | Partial                      | 127              |
| 3                        | 31 - 60 days          | Substantial                  | 113              |
| 3                        | 61 - 90 days          | Partial                      | 14               |
| 3                        | 61 - 90 days          | Substantial                  | 7                |

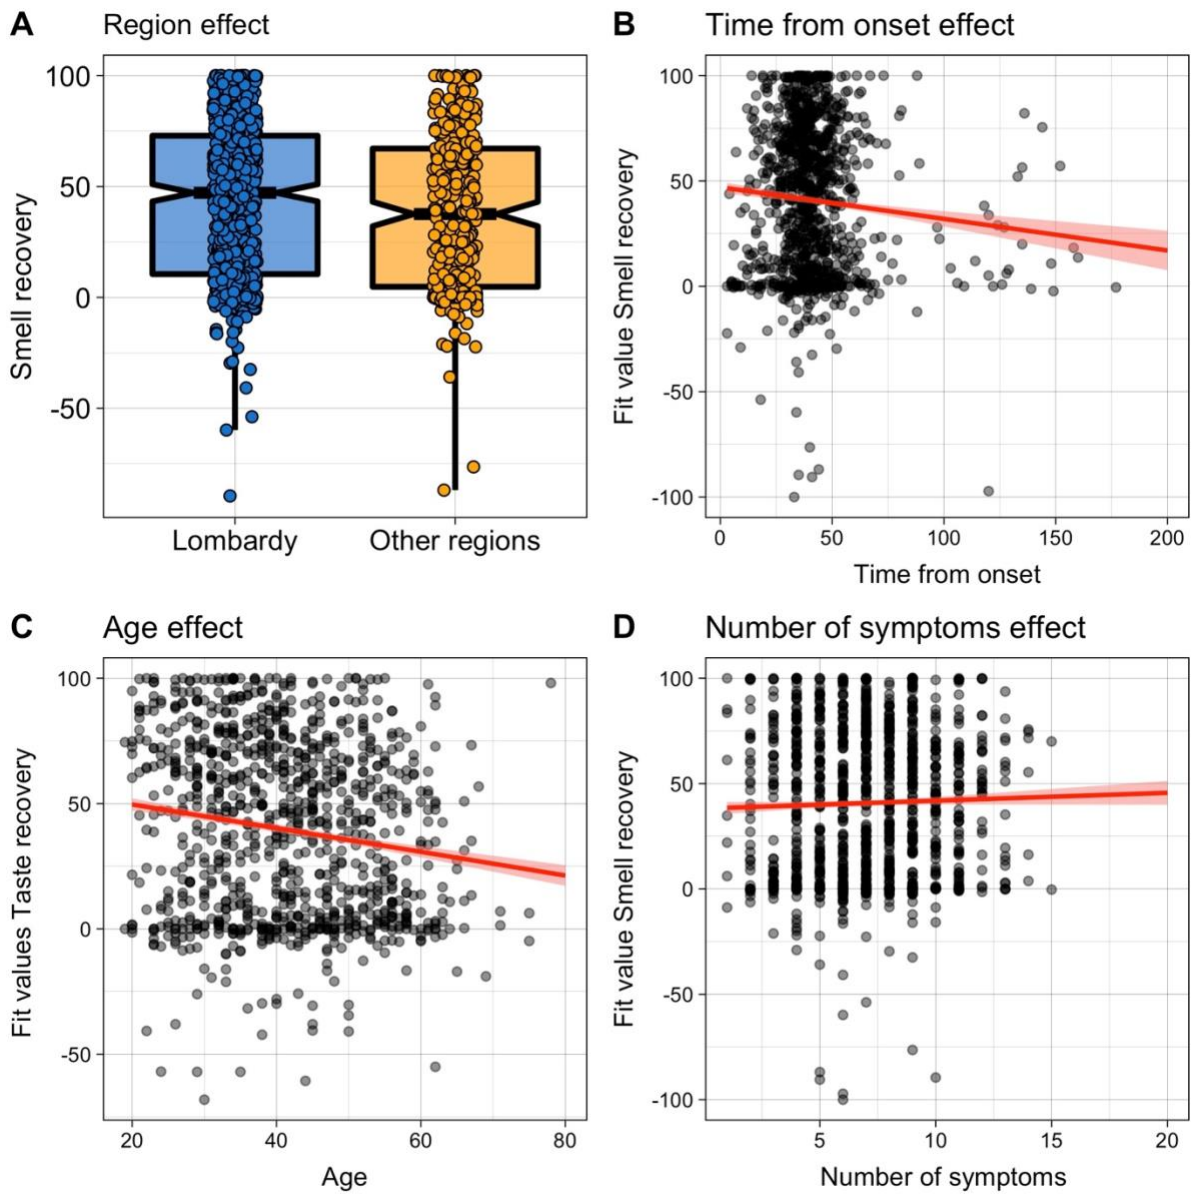

**Figure 1s.** Significant main effect predictors of smell recovery. A) Data distribution by region. Boxplots depict the median (horizontal black line) and quartile ranges of the distribution, whiskers indicate maximum and minimum values, colored dots represent data distribution. B) C), and D) Main effect of time from the onset, age, and number of the symptoms, with data distribution as black and grey dots and fitted lines in red.

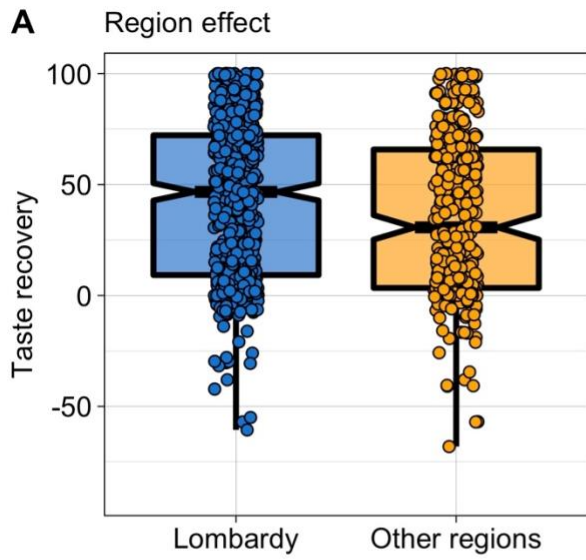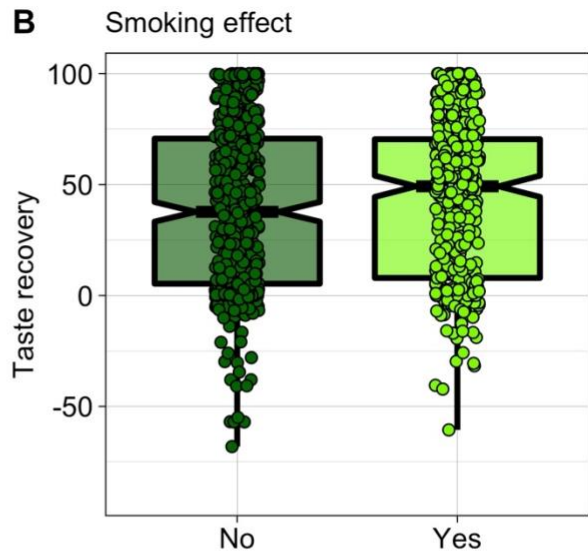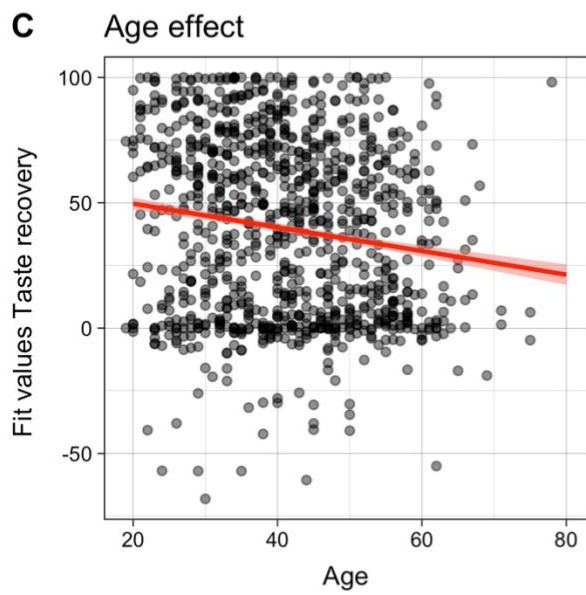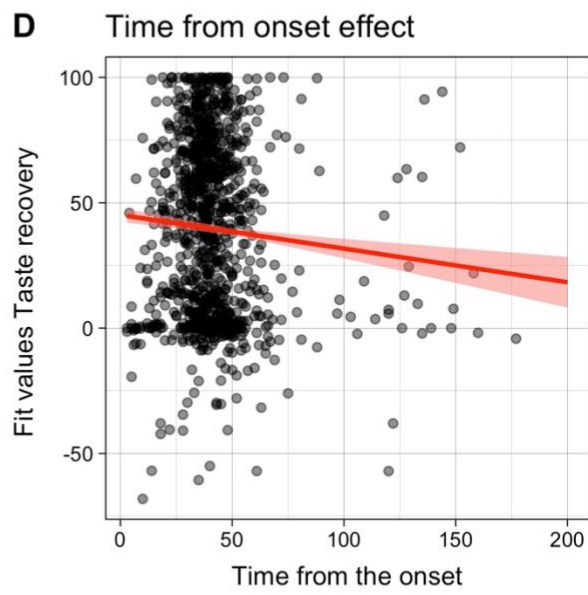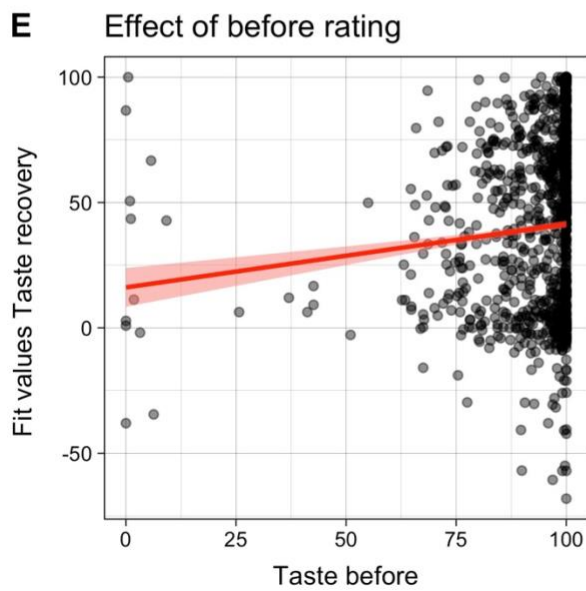

**Figure 2s.** Significant main effect predictors of taste recovery. A) and B) Data distribution by region and by smoking. Boxplots depict the median (horizontal black line) and quartile ranges of the distribution, whiskers indicate maximum and minimum values, colored dots represent data distribution. C), D), E) Main effect of age, time from onset, and before rating, with data distribution as black and grey dots and fitted lines in red.

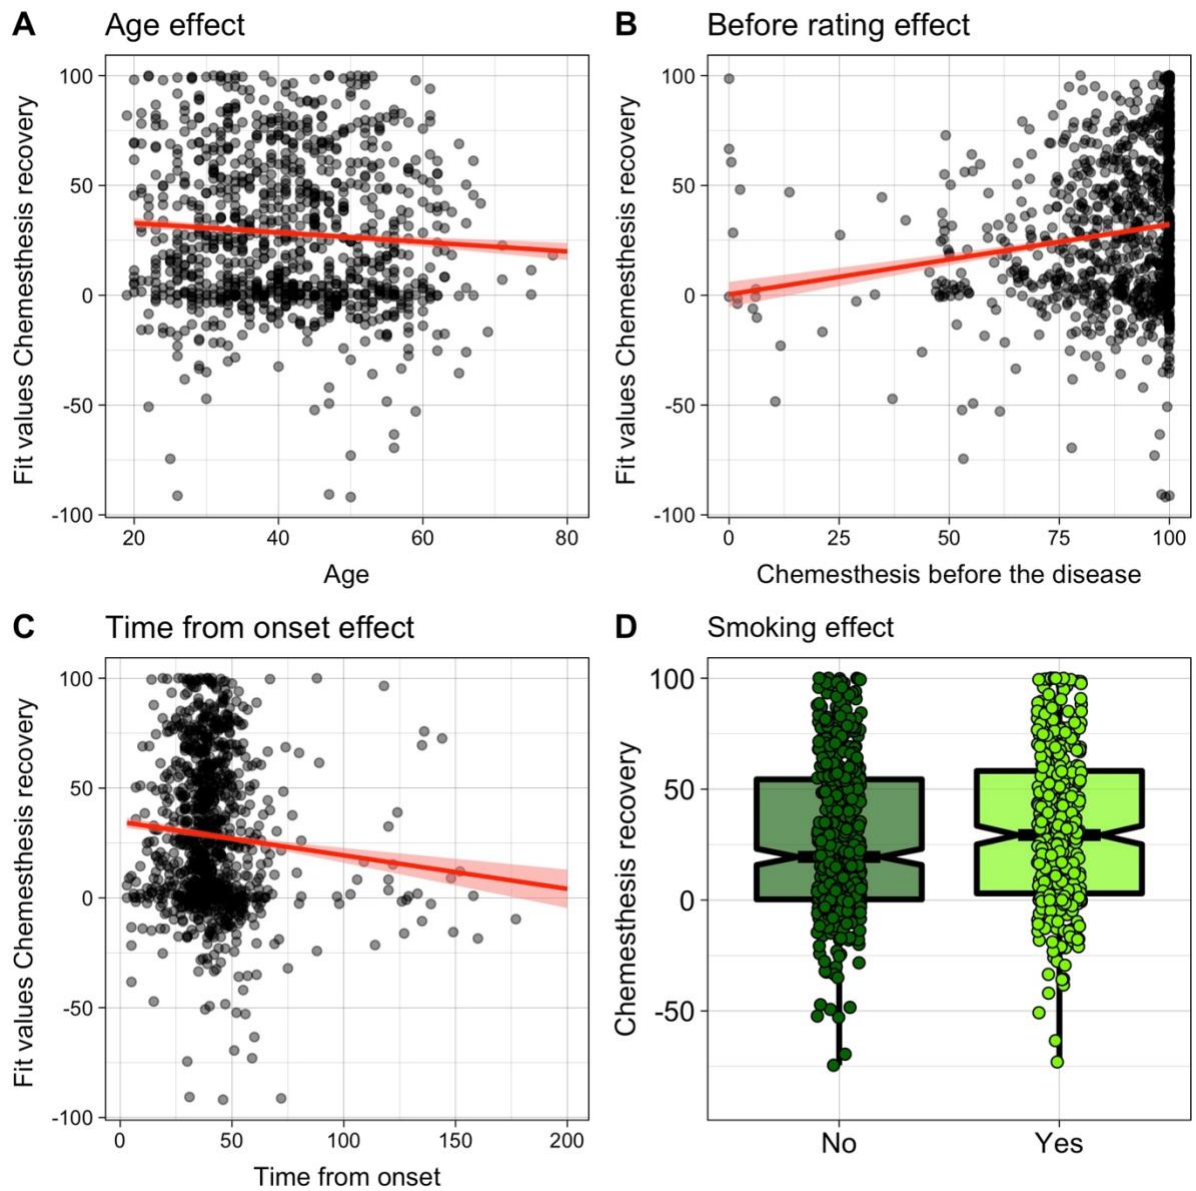

**Figure 3s.** Significant main effect predictors of chemesthesis recovery. A), B), and C) Main effect of age, before rating, and time from the onset of the disease with data distribution as black and grey dots and fitted lines in red. D) Data distribution by smoking. Boxplots depict the median (horizontal black line) and quartile ranges of the distribution, whiskers indicate maximum and minimum values, colored dots represent data distribution.
